# Supplementary material
Source: PubMed Central journal article supplement (PMC11664940)
Supplement: media-1.pdf [file media-1.pdf]

## Supplemental Material for:

### Prevalence of Asymptomatic non-Falciparum and Falciparum Malaria in the 2014-15 Rwanda Demographic Health Survey

Claudia Gaither<sup>1</sup>, Camille Morgan<sup>2</sup>, Rebecca Kirby<sup>3</sup>, Corine Karema<sup>4</sup>, Pierre Gashema<sup>5</sup>, Sam White<sup>1</sup>, Hillary Topazian<sup>6</sup>, David Geibrecht<sup>3</sup>, Kyaw Thwai<sup>1</sup>, Koby Boyter<sup>1</sup>, Tharcisse Munyaneza<sup>7</sup>, Claude Mambo<sup>8</sup>, Jean De Dieu Butera<sup>7</sup>, Jeffrey A. Bailey<sup>3\*</sup>, Jean-Baptiste Mazarati<sup>4,5\*</sup>, Jonathan J. Juliano<sup>1,2,9,10\*#</sup>

1: Institute for Global Health and Infectious Diseases, University of North Carolina, Chapel Hill, NC, USA

2: Department of Epidemiology, Gillings School of Global Public Health, University of North Carolina, Chapel Hill, NC, USA

3: Department of Pathology, Brown University, Providence, RI, USA

4: Quality Equity Health Care, Kigali, Rwanda

5: INES-Ruhengeri, Ruhengeri, Rwanda

6: Imperial College, London, UK

7: National Reference Laboratory, Rwanda Biomedical Center, Kigali, Rwanda

8: Rwanda Biomedical Centre, Kigali, Rwanda

9: Division of Infectious Diseases, School of Medicine, University of North Carolina, Chapel Hill, NC, USA

10: Curriculum in Genetics and Molecular Biology, School of Medicine, University of North Carolina, Chapel Hill, NC, USA

**Supplemental Figure 1. Distribution of 2014-2015 Rwanda Demographic Health Survey Clusters.**

Clusters are color coded based upon malaria transmission intensity based on DHS malaria testing results (high represents >15% positive by RDT or microscopy). Shape fill is based on the cluster's inclusion in this analysis.

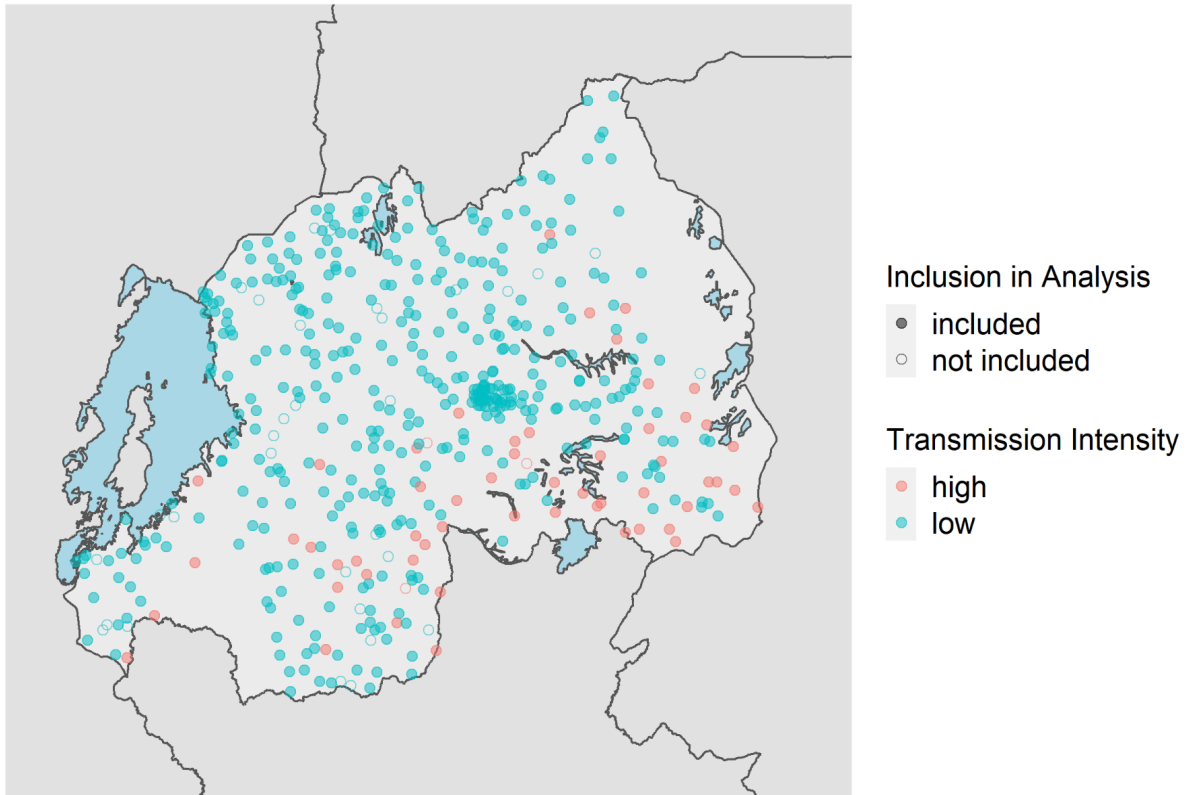

**Supplemental Figure 2. Distribution of clusters where malaria species were Identified.** Panel A, B, C and D represent clusters where *P. falciparum*, *P. malariae*, *P. ovale* spp, and *P. vivax* malaria were identified, respectively. Mixed infections are denoted.

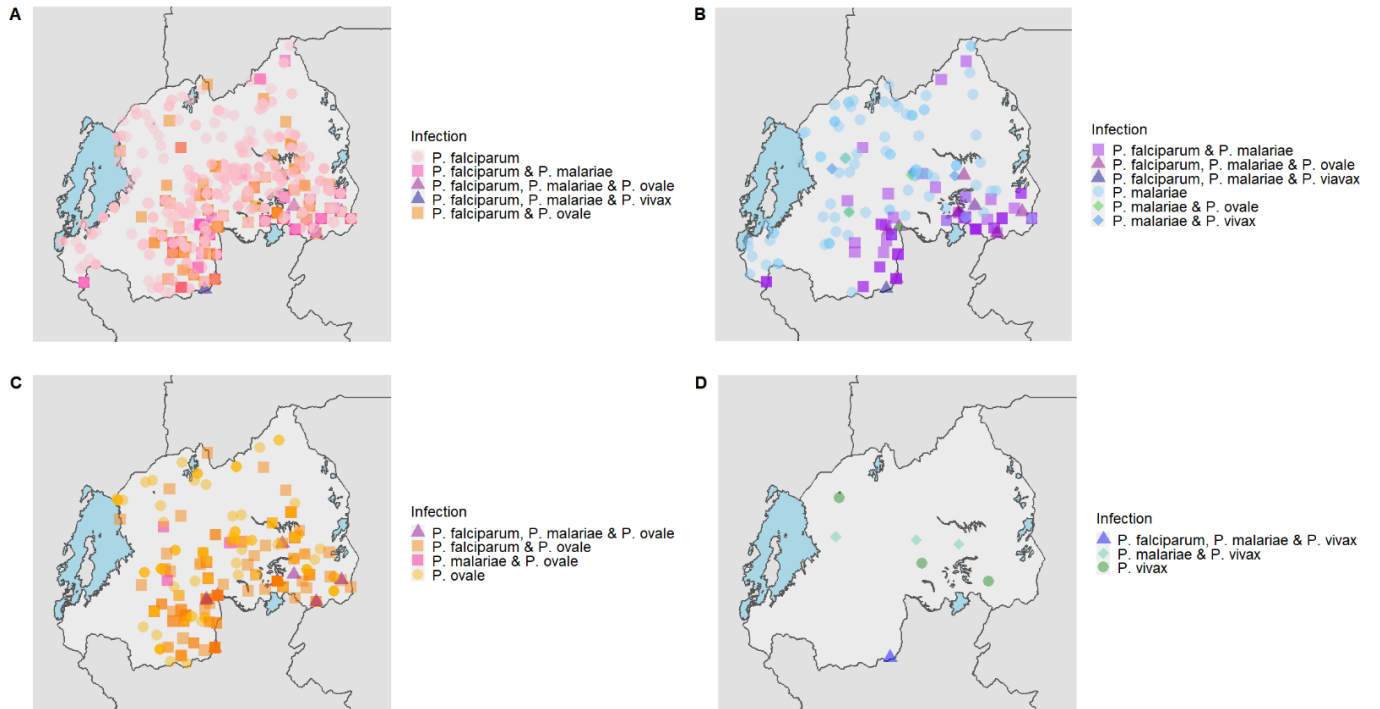

## Supplemental Table 1. PCR Primers, Probes and Reaction Condition

### *Plasmodium falciparum (varATS)*

Adapted from: Hoffman, N, et. al. PLOS Medicine. 2015.

Forward Primer 5' - CCCATACACAACCAAYTGGG - 3'

Reverse Primer 5' - TTCGCACATATCTCTATGTCTATCT - 3'

Probe 5' - 6-FAM-TRTCCATAAAATGGT-NFQ-MGB - 3'

| Cycling conditions     |  | 45 cycles |        |      |       |
|------------------------|--|-----------|--------|------|-------|
| temp (degrees Celsius) |  | 50        | 95     | 95   | 55    |
| time                   |  | 2 min     | 10 min | 15 s | 1 min |

Roche FastStart Universal Probe Master

Fwd primer 800 nM

Rev primer 800 nM

Probe 400 nM

Template DNA 2.5 µl

Total volume 12.5 µl

### *Plasmodium ovale (18s)*

Adapted from: Mitchell C, et. al. Journal of Infectious Diseases. 2021

Forward Primer 5' - CCRACTAGGTTTTGGATGAAVRTTTTT - 3'

Reverse Primer 5' - AACCCAAAGACTTTGATTTCTCATAA - 3'

Probe 5' - VIC/CRAAAGGAATTYTCTTATT - 3'

| Cycling conditions     |  | 45 cycles |        |      |       |
|------------------------|--|-----------|--------|------|-------|
| temp (degrees Celsius) |  | 50        | 95     | 95   | 52    |
| time                   |  | 2 min     | 10 min | 15 s | 1 min |

Roche FastStart Universal Probe Master (Rox)

Fwd primer 400 nM

Rev primer 400 nM

Probe 200 nM

Template DNA 2 µl

Total volume 12 µl

### *Plasmodium malariae (18s)*

Rougemont M, et. al. Journal of Clinical Microbiology. 2004.

5' - AGTTAAGGGAGTGAAGACGATCAGA - 3'

5' - CAACCCAAAGACTTTGATTTCTCATAA - 3'

5' - 6-FAM-ATGAGTGTTCCTTTTAGATAGC-NFQ-MGB - 3'

| Cycling conditions     |  | 45 cycles |        |      |       |
|------------------------|--|-----------|--------|------|-------|
| temp (degrees Celsius) |  | 50        | 95     | 95   | 60    |
| time                   |  | 2 min     | 10 min | 15 s | 1 min |

Roche FastStart Universal Probe Master

Fwd primer 300 nM

Rev primer 300 nM

Probe 400 nM

Template DNA 2 µl

Total volume 12.5 µl

### *Plasmodium vivax (18s)*

Brazeau N, et. al. Nature Communications. 2021

5' - ACGCTTCTAGCTTAATCCACATAACT - 3'

5' - ATTTACTCAAAGTAACAAGGACTTCCAAGC - 3'

5' - /56-FAM/TTCGTATCG/ZEN/ACTTTGTGCGCATTTTGC/3IABkFQ/ - 3'

| Cycling conditions     |  | 45 cycles |        |      |       |
|------------------------|--|-----------|--------|------|-------|
| temp (degrees Celsius) |  | 50        | 95     | 95   | 60    |
| time                   |  | 2 min     | 10 min | 15 s | 1 min |

Roche FastStart Universal Probe Master (Rox)

Fwd primer 400 nM

Rev primer 400 nM

Probe 200 nM

Template DNA 5 µl

Total volume 18 µl

**Supplemental Table 2. Cross reactivity of non-falciparum real time PCRs at 45 cycles.** Each assay was run to 45 cycles against plasmids diluted to representative parasitemias (based on 6 copies per genomic equivalent).

| Assay              | Template             | Genomic equivalent (GE) | # positive | Ct of positive |
|--------------------|----------------------|-------------------------|------------|----------------|
| <i>P. vivax</i>    | <i>P. falciparum</i> | 212 GE/ul               | 0/20       | ND             |
|                    | <i>P. ovale</i>      | 110 GE/ul               | 0/20       | ND             |
|                    | <i>P. malariae</i>   | 100 GE/ul               | 1/20       | 42.1           |
| <i>P. ovale</i>    | <i>P. falciparum</i> | 212 GE/ul               | 1/20       | 43.7           |
|                    | <i>P. vivax</i>      | 76.5 GE/ul              | 0/20       | ND             |
|                    | <i>P. malariae</i>   | 100 GE/ul               | 1/20       | 42.5           |
| <i>P. malariae</i> | <i>P. falciparum</i> | 212 GE/ul               | 0/20       | ND             |
|                    | <i>P. vivax</i>      | 76.5 GE/ul              | 0/20       | ND             |
|                    | <i>P. ovale</i>      | 110 GE/ul               | 0/20       | ND             |

**Supplemental Table 3. Comparison of Population Used for Molecular Screening to Overall DHS Population (weighted counts)**

| <i>Individual Level Covariates</i>            |                |                   |          |                    |          |
|-----------------------------------------------|----------------|-------------------|----------|--------------------|----------|
| <b>Variable</b>                               |                | <b>This Study</b> | <b>%</b> | <b>Overall DHS</b> | <b>%</b> |
| <i>Sex of respondent</i>                      | Male           | 2755              | 59.69%   | 8490               | 63.61%   |
|                                               | Female         | 1861              | 40.31%   | 4858               | 36.39%   |
| <i>Age group (years)</i>                      | 0-15           | 121               | 2.63%    | 255                | 1.91%    |
|                                               | 15-24          | 658               | 14.25%   | 1614               | 12.09%   |
|                                               | 25-34          | 1450              | 31.41%   | 4297               | 32.19%   |
|                                               | 35-44          | 930               | 20.15%   | 2827               | 21.18%   |
|                                               | 45-54          | 843               | 18.25%   | 2586               | 19.37%   |
|                                               | 55+            | 614               | 13.31%   | 1770               | 13.26%   |
| <i>Wealth Quintile</i>                        | Poorest        | 694               | 15.04%   | 2211               | 16.56%   |
|                                               | Poorer         | 820               | 17.77%   | 2470               | 18.51%   |
|                                               | Middle         | 828               | 17.94%   | 2641               | 19.78%   |
|                                               | Richer         | 1027              | 22.26%   | 2842               | 21.29%   |
|                                               | Richest        | 1246              | 26.98%   | 3184               | 23.86%   |
| <i>Education</i>                              | None/preschool | 907               | 19.66%   | 2741               | 20.56%   |
|                                               | Primary        | 2779              | 60.22%   | 8371               | 62.78%   |
|                                               | Secondary      | 724               | 15.68%   | 1663               | 12.47%   |
|                                               | Higher         | 205               | 4.44%    | 559                | 4.20%    |
| <i>Owns livestock, herds, or farm animals</i> | No             | 2068              | 44.79%   | 5829               | 43.67%   |
|                                               | Yes            | 2548              | 55.21%   | 7519               | 56.33%   |
| <i>Source of drinking water</i>               | Unpiped        | 3912              | 84.79%   | 11719              | 87.84%   |
|                                               | Piped          | 702               | 15.21%   | 1622               | 12.16%   |
| <i>Household bed net</i>                      | No             | 798               | 17.28%   | 2199               | 16.47%   |
|                                               | Yes            | 3818              | 82.72%   | 11150              | 83.53%   |
| <i>Slept under LLIN last night</i>            | No             | 1458              | 31.58%   | 4101               | 30.72%   |
|                                               | Yes            | 3158              | 68.42%   | 9248               | 69.28%   |
| <i>Insecticide-treated household net</i>      | No             | 7                 | 0.14%    | 21                 | 0.16%    |
|                                               | Yes            | 3527              | 76.41%   | 10414              | 78.02%   |
|                                               | Missing data   | 1082              | 23.45%   | 2913               | 21.83%   |
| <i>1 bed net per 1.8 household members</i>    | No             | 1905              | 41.37%   | 5238               | 39.32%   |
|                                               | Yes            | 2699              | 58.63%   | 8084               | 60.68%   |
| <i>Cluster level covariates</i>               |                |                   |          |                    |          |
| <i>Region</i>                                 | Kigali City    | 699               | 15.15%   | 1803               | 13.51%   |
|                                               | South          | 1176              | 25.48%   | 3248               | 24.33%   |
|                                               | West           | 1026              | 22.23%   | 2934               | 21.98%   |
|                                               | North          | 776               | 16.81%   | 2121               | 15.89%   |
|                                               | East           | 938               | 20.32%   | 3243               | 24.29%   |

|                                 |           |      |        |       |        |
|---------------------------------|-----------|------|--------|-------|--------|
| <i>Place of residence</i>       | Urban     | 1096 | 23.74% | 2715  | 20.34% |
|                                 | Rural     | 3520 | 76.26% | 10634 | 79.66% |
| <i>Elevation (m)</i>            | 500-1000  | 15   | 0.33%  | 50    | 0.37%  |
|                                 | 1001-1500 | 1263 | 27.37% | 4013  | 30.06% |
|                                 | 1501-2000 | 2450 | 53.07% | 7020  | 52.59% |
|                                 | 2001-2500 | 822  | 17.80% | 2146  | 16.07% |
|                                 | 2500 <    | 66   | 1.43%  | 121   | 0.91%  |
|                                 |           |      |        |       |        |
| <i>Month of data collection</i> | 15-Jan    | 1067 | 23.11% | 3117  | 23.35% |
|                                 | 15-Feb    | 780  | 16.90% | 2432  | 18.22% |
|                                 | 15-Mar    | 1100 | 23.83% | 2872  | 21.52% |
|                                 | 15-Apr    | 32   | 0.70%  | 94    | 0.70%  |
|                                 | 14-Nov    | 457  | 9.90%  | 1884  | 14.11% |
|                                 | 14-Dec    | 1180 | 25.56% | 2950  | 22.10% |

**Supplemental Table 4. Impact of potential false positivity on unadjusted prevalence.** 3/160 replicates were false positive across assays: 1.9% (95%CI: 0.3%-5.4%) Binomial exact method. All adjustments rounded up to higher integer.

|                      | Number tested | # Ct≤40 | # Ct>40 | Unweighted Prevalence | 0.3% false positive in Ct>40 | Adjusted unweighted prevalence | 5.4% false positive in Ct>40 | Adjusted unweighted prevalence |
|----------------------|---------------|---------|---------|-----------------------|------------------------------|--------------------------------|------------------------------|--------------------------------|
| <i>P. falciparum</i> | 4,595         | 1065    | 166     | 26.8%                 | 165                          | 26.8%                          | 157                          | 26.6%                          |
| <i>P. malariae</i>   |               | 147     | 21      | 3.7%                  | 20                           | 3.6%                           | 19                           | 3.6%                           |
| <i>P. ovale</i>      |               | 101     | 145     | 5.4%                  | 144                          | 5.3%                           | 136                          | 5.2%                           |



**Supplemental Table 5. Differences in District Level Prevalence by PCR Cutoff.** The difference in prevalence for malaria for each district between the 45 and 40 PCR cycle threshold is shown for overall malaria burden, as well as for each species. Darker shading denotes larger differences in prevalence estimates, and districts are ordered by the difference in overall malaria prevalence from highest to lowest difference in prevalence.

| <i>District</i> | <i>Difference in overall malaria prevalence</i> | <i>Difference in Pf prevalence</i> | <i>Difference in Pm prevalence</i> | <i>Difference in Po prevalence</i> | <i>Difference in Pv prevalence</i> |
|-----------------|-------------------------------------------------|------------------------------------|------------------------------------|------------------------------------|------------------------------------|
| Nyarugenge      | 0.128                                           | 0.039                              | 0.027                              | 0.063                              | 0.000                              |
| Gatsibo         | 0.120                                           | 0.047                              | 0.000                              | 0.112                              | 0.000                              |
| Ngoma           | 0.102                                           | 0.054                              | 0.002                              | 0.091                              | 0.002                              |
| Burera          | 0.090                                           | 0.037                              | 0.018                              | 0.034                              | 0.000                              |
| Huye            | 0.089                                           | 0.073                              | 0.002                              | 0.033                              | 0.000                              |
| Rwamagana       | 0.088                                           | 0.052                              | 0.015                              | 0.071                              | 0.000                              |
| Kirehe          | 0.084                                           | 0.052                              | 0.003                              | 0.046                              | 0.000                              |
| Gasabo          | 0.080                                           | 0.037                              | 0.000                              | 0.043                              | 0.000                              |
| Nyamagabe       | 0.074                                           | 0.053                              | 0.000                              | 0.036                              | 0.000                              |
| Rubavu          | 0.068                                           | 0.029                              | 0.000                              | 0.040                              | 0.000                              |
| Kamonyi         | 0.063                                           | 0.024                              | 0.007                              | 0.047                              | 0.000                              |
| Nyaruguru       | 0.063                                           | 0.049                              | 0.000                              | 0.039                              | 0.000                              |
| Kayonza         | 0.061                                           | 0.048                              | 0.000                              | 0.020                              | 0.000                              |
| Karongi         | 0.061                                           | 0.002                              | 0.000                              | 0.061                              | 0.000                              |
| Gakenke         | 0.061                                           | 0.027                              | 0.034                              | 0.000                              | 0.000                              |
| Gicumbi         | 0.060                                           | 0.017                              | 0.009                              | 0.033                              | 0.000                              |
| Ruhango         | 0.059                                           | 0.030                              | 0.021                              | 0.038                              | 0.000                              |
| Gisagara        | 0.058                                           | 0.052                              | 0.003                              | 0.068                              | 0.000                              |
| Nyabihu         | 0.057                                           | 0.022                              | 0.007                              | 0.018                              | 0.010                              |
| Muhanga         | 0.046                                           | 0.023                              | 0.000                              | 0.023                              | 0.000                              |
| Nyamasheke      | 0.043                                           | 0.043                              | 0.000                              | 0.000                              | 0.000                              |
| Nyanza          | 0.043                                           | 0.041                              | 0.006                              | 0.020                              | 0.000                              |
| Nyagatare       | 0.041                                           | 0.041                              | 0.000                              | 0.018                              | 0.000                              |
| Kicukiro        | 0.040                                           | 0.026                              | 0.000                              | 0.021                              | 0.000                              |
| Musanze         | 0.036                                           | 0.022                              | 0.006                              | 0.008                              | 0.000                              |
| Rutsiro         | 0.035                                           | 0.045                              | 0.000                              | 0.000                              | 0.015                              |
| Bugesera        | 0.034                                           | 0.014                              | 0.002                              | 0.025                              | 0.008                              |
| Ngororero       | 0.021                                           | 0.010                              | 0.010                              | 0.010                              | 0.000                              |
| Rusizi          | 0.018                                           | 0.010                              | 0.008                              | 0.000                              | 0.000                              |
| Rulindo         | 0.015                                           | 0.008                              | 0.000                              | 0.007                              | 0.000                              |

**Supplemental Table 6. District Level Malaria Prevalence at Different Cycle Cutoffs.** The district level weighted prevalence for all malaria, all non-Pf malaria and reach species is shown for a cycle cut off of 45 cycles and 40 cycles.

| <i>District</i> | <i>n</i> | 45 cycles          |               |           |           |           |           | 40 cycles          |               |           |           |           |           |
|-----------------|----------|--------------------|---------------|-----------|-----------|-----------|-----------|--------------------|---------------|-----------|-----------|-----------|-----------|
|                 |          | <i>all malaria</i> | <i>non-Pf</i> | <i>Pf</i> | <i>Pm</i> | <i>Po</i> | <i>Pv</i> | <i>all malaria</i> | <i>non-Pf</i> | <i>Pf</i> | <i>Pm</i> | <i>Po</i> | <i>Pv</i> |
| Bugesera        | 244      | 36.6               | 7.2           | 32.6      | 1.8       | 4.6       | 0.8       | 33.2               | 3.7           | 31.2      | 1.5       | 2.2       | 0.0       |
| Burera          | 117      | 16.0               | 10.9          | 6.1       | 4.5       | 6.4       | 0.0       | 7.1                | 5.7           | 2.4       | 2.7       | 3.0       | 0.0       |
| Gakenke         | 99       | 8.2                | 4.7           | 3.4       | 4.7       | 0.0       | 0.0       | 2.1                | 1.4           | 0.7       | 1.4       | 0.0       | 0.0       |
| Gasabo          | 151      | 16.5               | 4.3           | 12.2      | 0.0       | 4.3       | 0.0       | 8.5                | 0.0           | 8.5       | 0.0       | 0.0       | 0.0       |
| Gatsibo         | 150      | 37.3               | 14.8          | 27.4      | 0.0       | 14.8      | 0.0       | 25.2               | 3.5           | 22.8      | 0.0       | 3.5       | 0.0       |
| Gicumbi         | 104      | 13.3               | 8.1           | 5.2       | 4.8       | 3.3       | 0.0       | 7.3                | 3.8           | 3.5       | 3.8       | 0.0       | 0.0       |
| Gisagara        | 188      | 45.3               | 13.3          | 41.5      | 3.2       | 9.2       | 0.9       | 39.5               | 6.2           | 36.2      | 2.9       | 2.4       | 0.9       |
| Huye            | 151      | 45.0               | 11.2          | 39.8      | 0.2       | 10.9      | 0.0       | 36.0               | 7.6           | 32.5      | 0.0       | 7.6       | 0.0       |
| Kamonyi         | 139      | 25.7               | 7.1           | 21.0      | 0.7       | 6.4       | 0.0       | 19.4               | 1.7           | 18.6      | 0.0       | 1.7       | 0.0       |
| Karongi         | 142      | 13.9               | 9.4           | 5.6       | 1.5       | 7.9       | 0.0       | 7.8                | 3.3           | 5.5       | 1.5       | 1.8       | 0.0       |
| Kayonza         | 211      | 35.1               | 7.3           | 29.1      | 2.2       | 5.1       | 0.0       | 28.9               | 5.4           | 24.3      | 2.2       | 3.1       | 0.0       |
| Kicukiro        | 161      | 12.5               | 6.6           | 7.1       | 3.8       | 2.8       | 0.0       | 8.5                | 4.5           | 4.6       | 3.8       | 0.7       | 0.0       |
| Kirehe          | 281      | 54.8               | 11.6          | 50.8      | 5.3       | 6.3       | 0.0       | 46.4               | 6.7           | 45.6      | 5.0       | 1.6       | 0.0       |
| Muhanga         | 122      | 14.9               | 3.8           | 12.5      | 0.7       | 3.1       | 0.0       | 10.3               | 1.5           | 10.3      | 0.7       | 0.7       | 0.0       |
| Musanze         | 119      | 9.6                | 4.8           | 4.8       | 4.0       | 0.8       | 0.0       | 5.9                | 3.4           | 2.6       | 3.4       | 0.0       | 0.0       |
| Ngoma           | 257      | 56.0               | 21.4          | 46.5      | 6.9       | 14.3      | 0.2       | 45.8               | 11.9          | 41.0      | 6.7       | 5.2       | 0.0       |
| Ngororero       | 100      | 11.2               | 9.1           | 4.0       | 6.2       | 3.0       | 0.0       | 9.1                | 7.0           | 2.9       | 5.1       | 1.9       | 0.0       |
| Nyabihu         | 120      | 9.8                | 6.7           | 3.7       | 3.3       | 2.5       | 1.0       | 4.1                | 3.2           | 1.5       | 2.5       | 0.7       | 0.0       |
| Nyagatare       | 113      | 21.6               | 9.0           | 15.4      | 6.3       | 2.6       | 0.0       | 17.6               | 7.1           | 11.3      | 6.3       | 0.8       | 0.0       |
| Nyamagabe       | 203      | 25.5               | 10.8          | 16.7      | 4.7       | 6.1       | 0.0       | 18.0               | 7.2           | 11.5      | 4.7       | 2.5       | 0.0       |
| Nyamasheke      | 142      | 16.9               | 3.1           | 13.8      | 3.1       | 0.0       | 0.0       | 12.6               | 3.1           | 9.6       | 3.1       | 0.0       | 0.0       |
| Nyanza          | 193      | 56.9               | 9.3           | 54.7      | 4.1       | 5.1       | 0.0       | 52.6               | 6.6           | 50.6      | 3.5       | 3.1       | 0.0       |
| Nyarugenge      | 183      | 19.9               | 11.7          | 9.3       | 3.7       | 7.3       | 0.6       | 7.0                | 2.7           | 5.4       | 1.1       | 1.0       | 0.6       |
| Nyaruguru       | 141      | 24.3               | 9.2           | 20.2      | 3.1       | 6.1       | 0.0       | 18.0               | 5.3           | 15.2      | 3.1       | 2.2       | 0.0       |
| Rubavu          | 105      | 16.5               | 8.1           | 8.5       | 1.8       | 6.3       | 0.0       | 9.7                | 4.1           | 5.6       | 1.8       | 2.3       | 0.0       |
| Ruhango         | 147      | 34.2               | 10.2          | 28.4      | 4.4       | 5.7       | 0.0       | 28.3               | 4.2           | 25.4      | 2.3       | 1.9       | 0.0       |
| Rulindo         | 116      | 10.3               | 2.5           | 7.8       | 0.7       | 1.8       | 0.0       | 8.8                | 1.8           | 7.0       | 0.7       | 1.1       | 0.0       |
| Rusizi          | 165      | 13.9               | 5.6           | 8.7       | 5.6       | 0.0       | 0.0       | 12.1               | 4.9           | 7.7       | 4.9       | 0.0       | 0.0       |
| Rutsiro         | 98       | 12.7               | 7.5           | 7.7       | 5.0       | 1.0       | 1.5       | 9.2                | 6.0           | 3.1       | 5.0       | 1.0       | 0.0       |
| Rwamagana       | 134      | 33.5               | 13.7          | 25.6      | 4.4       | 8.6       | 0.7       | 24.6               | 5.1           | 20.4      | 2.9       | 1.5       | 0.7       |

**Supplemental Table 7. Mixed Species Infection Count.** Weighted and unweighted counts for mono and coinfections, separated by species. Values for both 45 and 40 cycles as a cutoff are included.

|                         |      |
|-------------------------|------|
| <i>unweighted count</i> | 4595 |
| <i>weighted count</i>   | 4616 |

***P. falciparum* infection counts**

|                                   | <i>mono infection</i> | <i>total co-infection</i> | <i>pf_pm</i> | <i>pf_po</i> | <i>pf_pm_po</i> | <i>pf_pm_pv</i> | <b><i>total</i></b> |
|-----------------------------------|-----------------------|---------------------------|--------------|--------------|-----------------|-----------------|---------------------|
| <i>45 cycles unweighted</i>       | 1069                  | 162                       | 56           | 96           | 9.0             | 1.0             | 1231                |
| <i>45 cycles weighted</i>         | 710                   | 103                       | 28           | 69           | 4.7             | 1.2             | 813                 |
| <i>under 40 cycles unweighted</i> | 964                   | 101                       | 50           | 47           | 4.0             | 0.0             | 1065                |
| <i>under 40 cycles weighted</i>   | 604                   | 54                        | 25           | 27           | 1.2             | 0.0             | 658                 |

***P. malariae* infection counts**

|                                   | <i>mono infection</i> | <i>total co-infection</i> | <i>pf_pm</i> | <i>pm_po</i> | <i>pm_pv</i> | <i>pf_pm_po</i> | <i>pf_pm_pv</i> | <b><i>total</i></b> |
|-----------------------------------|-----------------------|---------------------------|--------------|--------------|--------------|-----------------|-----------------|---------------------|
| <i>45 cycles unweighted</i>       | 94                    | 74                        | 56           | 5.0          | 3.0          | 9.0             | 1.0             | 168                 |
| <i>45 cycles weighted</i>         | 109                   | 43                        | 28           | 5.4          | 3.6          | 4.7             | 1.2             | 152                 |
| <i>under 40 cycles unweighted</i> | 84                    | 63                        | 50           | 1.0          | 2.0          | 9.0             | 1.0             | 147                 |
| <i>under 40 cycles weighted</i>   | 95                    | 34                        | 25           | 0.9          | 2.4          | 4.7             | 1.2             | 129                 |

***P. ovale* infection counts**

|                                   | <i>mono infection</i> | <i>total co-infection</i> | <i>pf_po</i> | <i>pm_po</i> | <i>pf_pm_po</i> | <b><i>total</i></b> |
|-----------------------------------|-----------------------|---------------------------|--------------|--------------|-----------------|---------------------|
| <i>45 cycles unweighted</i>       | 136                   | 110                       | 96           | 5.0          | 9.0             | 246                 |
| <i>45 cycles weighted</i>         | 158                   | 79                        | 69           | 5.4          | 4.7             | 237                 |
| <i>under 40 cycles unweighted</i> | 44                    | 57                        | 47           | 1.0          | 9.0             | 101                 |
| <i>under 40 cycles weighted</i>   | 47                    | 33                        | 27           | 0.9          | 4.7             | 79                  |

***P. vivax* infection counts**

|                             | <i>mono infection</i> | <i>total co-infection</i> | <i>pm_pv</i> | <i>pf_pm_pv</i> | <b><i>total</i></b> |
|-----------------------------|-----------------------|---------------------------|--------------|-----------------|---------------------|
| <i>45 cycles unweighted</i> | 3.0                   | 4.0                       | 3.0          | 1.0             | 7.0                 |

|                                   |     |     |     |     |     |
|-----------------------------------|-----|-----|-----|-----|-----|
| <i>45 cycles weighted</i>         | 2.6 | 4.9 | 3.6 | 1.2 | 7.5 |
| <i>under 40 cycles unweighted</i> | 1.0 | 3.0 | 2.0 | 1.0 | 4.0 |
| <i>under 40 cycles weighted</i>   | 1.0 | 3.6 | 2.4 | 1.2 | 4.6 |

**All malaria counts**

|                                     | <i>mono infection</i> | <i>co-infection</i> | <i>total Pf</i> | <i>total Pm</i> | <i>total Po</i> | <i>total Pv</i> | <i>total non-pf</i> | <b><i>total</i></b> |
|-------------------------------------|-----------------------|---------------------|-----------------|-----------------|-----------------|-----------------|---------------------|---------------------|
| <i>unweighted count</i>             | 1302.0                | 350                 | 1231            | 168             | 246             | 7.0             | 421.0               | 1652.0              |
| <i>weighted count</i>               | 979                   | 230                 | 813             | 152             | 237             | 7               | 396                 | 1209                |
| <i>under 40 CT unweighted count</i> | 1092                  | 224.0               | 1019            | 128             | 93              | 4.0             | 225.0               | 1244.0              |
| <i>weighted under 40 count</i>      | 746                   | 125                 | 658             | 129             | 79              | 5               | 213                 | 871                 |
