# Supplementary material
Source: PubMed Central journal article supplement (PMC11664940)
Supplement: media-2.pdf [file media-2.pdf]

**Table 1. Study Population Characteristics and Distribution of PCR Positives by Species.** Weighted counts and percentages for all individuals positive for each species of malaria. Weights applied are DHS sampling weights, propensity score weights, and weights to correct for over-selection of high transmission intensity clusters (transmission intensity weights). Characteristics of the included study population are also shown.

|                                        |                | Pf positive |     | Pm positive |      | Po positive |     | Pv positive   |      | Included study population |     |
|----------------------------------------|----------------|-------------|-----|-------------|------|-------------|-----|---------------|------|---------------------------|-----|
| <i>Unweighted counts</i>               |                | 1231 (27%)  |     | 168 (3.7%)  |      | 246 (5.4%)  |     | 7.0 (0.0015%) |      | 4595                      |     |
| <i>Weighted counts</i>                 |                | 813 (18%)   |     | 152 (3.3%)  |      | 237 (5.1%)  |     | 7.5 (0.0016%) |      | 4616                      |     |
| <b>Individual level covariates</b>     |                |             |     |             |      |             |     |               |      |                           |     |
|                                        |                | n           | %   | n           | %    | n           | %   | n             | %    | n                         | %   |
| Sex of respondent                      | Male           | 453.4       | 56% | 89.0        | 59%  | 128.1       | 54% | 6.0           | 80%  | 2755.4                    | 60% |
|                                        | Female         | 359.5       | 44% | 62.9        | 41%  | 108.8       | 46% | 1.5           | 20%  | 1860.6                    | 40% |
| Age group (years)                      | 0-15           | 24.9        | 3%  | 1.5         | 1%   | 29.5        | 12% | 0.0           | 0%   | 121.4                     | 3%  |
|                                        | 15-24          | 114.4       | 14% | 14.2        | 9%   | 3.0         | 1%  | 0.8           | 11%  | 657.8                     | 14% |
|                                        | 25-34          | 234.3       | 29% | 43.2        | 28%  | 42.8        | 18% | 2.8           | 37%  | 1450.1                    | 31% |
|                                        | 35-44          | 167.3       | 21% | 34.6        | 23%  | 72.8        | 31% | 0.0           | 0%   | 929.9                     | 20% |
|                                        | 45-54          | 150.3       | 16% | 42.4        | 24%  | 50.3        | 20% | 2.4           | 32%  | 842.5                     | 18% |
|                                        | 55+            | 121.5       | 15% | 16.1        | 11%  | 38.5        | 16% | 1.5           | 20%  | 614.4                     | 13% |
| Wealth Quintile                        | Poorest        | 200.3       | 25% | 24.1        | 0.16 | 36.7        | 16% | 2.4           | 33%  | 694.4                     | 15% |
|                                        | Poorer         | 163.4       | 20% | 32.4        | 0.21 | 34.3        | 14% | 0.3           | 4%   | 820.4                     | 18% |
|                                        | Middle         | 161.4       | 20% | 29.5        | 0.19 | 34.8        | 15% | 0.0           | 0%   | 828.3                     | 18% |
|                                        | Richer         | 166.7       | 21% | 35.8        | 0.24 | 53.0        | 22% | 4.7           | 63%  | 1027.5                    | 22% |
|                                        | Richest        | 121.0       | 15% | 30.1        | 0.20 | 78.0        | 33% | 0.0           | 0%   | 1245.5                    | 27% |
| Education                              | None/preschool | 190.0       | 23% | 39.0        | 26%  | 40.1        | 17% | 5.1           | 68%  | 907.2                     | 20% |
|                                        | Primary        | 520.7       | 64% | 92.4        | 61%  | 140.4       | 59% | 2.4           | 32%  | 2779.0                    | 60% |
|                                        | Secondary      | 72.5        | 9%  | 11.6        | 8%   | 45.2        | 19% | 0.0           | 0%   | 723.7                     | 16% |
|                                        | Higher         | 29.5        | 4%  | 8.9         | 6%   | 11.2        | 5%  | 0.0           | 0%   | 205.1                     | 4%  |
| Owns livestock, herds, or farm animals | No             | 354.3       | 44% | 71.7        | 47%  | 102.6       | 43% | 4.8           | 64%  | 2067.7                    | 45% |
|                                        | Yes            | 458.6       | 56% | 80.2        | 53%  | 134.3       | 57% | 2.7           | 36%  | 2548.3                    | 55% |
| Source of drinking water               | Unpipied       | 756.6       | 93% | 138.5       | 91%  | 193.1       | 82% | 7.5           | 100% | 3911.7                    | 85% |
|                                        | Piped          | 55.3        | 7%  | 13.4        | 9%   | 43.8        | 18% | 0.0           | 0%   | 701.8                     | 15% |
| Household bed net                      | No             | 134.6       | 17% | 31.9        | 21%  | 36.5        | 15% | 3.3           | 44%  | 797.7                     | 17% |
|                                        | Yes            | 678.3       | 83% | 120.0       | 79%  | 200.4       | 85% | 4.2           | 56%  | 3818.3                    | 83% |
| Slept under LLIN last night            | No             | 257.2       | 32% | 59.1        | 39%  | 63.5        | 27% | 3.3           | 44%  | 1457.8                    | 32% |

|                                     |              |       |     |       |     |       |     |     |     |        |     |
|-------------------------------------|--------------|-------|-----|-------|-----|-------|-----|-----|-----|--------|-----|
| Insecticide-treated household net   | Yes          | 555.6 | 68% | 92.8  | 61% | 173.4 | 73% | 4.2 | 56% | 3158.2 | 68% |
|                                     | No           | 0.9   | 0%  | 0.0   | 0%  | 2.6   | 1%  | 0.0 | 0%  | 6.7    | 0%  |
| 1 bed net per 1.8 household members | Yes          | 616.7 | 76% | 115.8 | 76% | 180.4 | 76% | 4.2 | 56% | 3527.0 | 76% |
|                                     | Missing data | 195.2 | 24% | 36.1  | 24% | 53.9  | 23% | 3.3 | 44% | 1082.3 | 23% |
|                                     | No           | 291.2 | 36% | 61.0  | 41% | 101.8 | 43% | 3.3 | 44% | 1905.0 | 41% |
|                                     | Yes          | 520.9 | 64% | 88.6  | 59% | 135.1 | 57% | 4.2 | 56% | 2699.2 | 59% |

### ***Cluster level covariates***

|                          |                      |       |      |       |     |       |     |     |     |        |     |
|--------------------------|----------------------|-------|------|-------|-----|-------|-----|-----|-----|--------|-----|
| Region                   | Kigali City          | 70.5  | 9%   | 14.3  | 9%  | 33.2  | 14% | 1.2 | 16% | 699.4  | 15% |
|                          | South                | 332.8 | 41%  | 32.5  | 21% | 75.5  | 32% | 1.2 | 16% | 1176.2 | 25% |
|                          | West                 | 74.7  | 9%   | 37.9  | 25% | 33.2  | 14% | 3.0 | 40% | 1026.3 | 22% |
|                          | North                | 42.3  | 5%   | 29.4  | 19% | 19.1  | 8%  | 0.0 | 0%  | 776.0  | 17% |
|                          | East                 | 292.6 | 36%  | 37.9  | 25% | 75.9  | 32% | 2.1 | 28% | 938.1  | 20% |
| Place of residence       | Urban                | 95.9  | 12%  | 29.3  | 19% | 55.9  | 24% | 1.2 | 16% | 1096.0 | 24% |
|                          | Rural                | 717.0 | 88%  | 122.6 | 81% | 181.0 | 76% | 6.3 | 84% | 3520.0 | 76% |
| Elevation (m)            | 500 - 1000           | 3.3   | 0%   | 0.8   | 1%  | 0.0   | 0%  | 0.0 | 0%  | 15.4   | 0%  |
|                          | 2 1001 - 1500        | 352.2 | 43%  | 47.8  | 31% | 77.3  | 33% | 3.3 | 44% | 1263.3 | 27% |
|                          | 3 1501 - 2000        | 412.8 | 51%  | 67.2  | 44% | 121.0 | 51% | 1.2 | 16% | 2449.8 | 53% |
|                          | 4 2000 - 2500        | 41.2  | 5%   | 34.3  | 23% | 38.6  | 16% | 1.5 | 20% | 821.5  | 18% |
|                          | 5 > 2500             | 3.3   | 0%   | 1.9   | 1%  | 0.0   | 0%  | 1.5 | 20% | 66.0   | 1%  |
| Month of data collection | Jan-15               | 164.0 | 20%  | 28.3  | 19% | 42.8  | 18% | 0.0 | 0%  | 1066.8 | 23% |
|                          | Feb-15               | 186.1 | 23%  | 26.3  | 17% | 38.8  | 16% | 2.0 | 27% | 780.0  | 17% |
|                          | Mar-15               | 228.2 | 28%  | 39.5  | 26% | 76.0  | 32% | 2.7 | 37% | 1100.1 | 24% |
|                          | Apr-15               | 5.5   | 1%   | 1.3   | 1%  | 1.5   | 1%  | 0.0 | 0%  | 32.3   | 1%  |
|                          | Nov-14               | 95.7  | 9%   | 21.0  | 11% | 16.9  | 6%  | 1.2 | 12% | 456.8  | 8%  |
|                          | Dec-14               | 133.4 | 16%  | 35.5  | 23% | 60.9  | 26% | 1.5 | 20% | 1180.0 | 26% |
| Landcover                | Moderate forest      | 5.8   | 0.01 | 6.4   | 4%  | 13.3  | 6%  | 0.0 | 0%  | 304.2  | 7%  |
|                          | Sparse forest        | 239.6 | 0.29 | 2.3   | 2%  | 0.3   | 0%  | 0.0 | 0%  | 27.7   | 1%  |
|                          | Woodland             | 508.5 | 0.63 | 33.9  | 22% | 59.2  | 25% | 1.3 | 17% | 774.8  | 17% |
|                          | Closed grassland     | 33.7  | 0.04 | 100.4 | 66% | 149.2 | 63% | 6.2 | 83% | 3099.2 | 67% |
|                          | (Perennial) cropland | 25.1  | 0.03 | 8.9   | 6%  | 15.0  | 6%  | 0.0 | 0%  | 410.1  | 9%  |

### ***Cluster level averages***

**Pf positive      Pm positive      Po positive      Pv positive      overall study**

|                                                         | <i>mean</i> | <i>SE</i> |
|---------------------------------------------------------|-------------|-----------|-------------|-----------|-------------|-----------|-------------|-----------|-------------|-----------|
| Proportion of cluster with household bed nets           | 0.853       | 0.011     | 0.787       | 0.023     | 0.855       | 0.018     | 0.680       | 0.073     | 0.827       | 0.008     |
| Proportion of cluster that slept under a net last night | 0.697       | 0.014     | 0.631       | 0.027     | 0.741       | 0.024     | 0.560       | 0.064     | 0.684       | 0.010     |
| Current month's average daily max temp (degrees C)      | 27.16       | 0.1       | 26.40       | 0.2       | 26.84       | 0.2       | 25.96       | 1.0       | 26.39       | 0.05      |
| Prior month's precipitation (mm)                        | 80.60       | 2.4       | 91.05       | 4.2       | 86.02       | 4.7       | 94.51       | 21.1      | 90.38       | 1.38      |
